# Supplementary material
Source: Elsevier journal article supplement (https://www.sciencedirect.com/science/article/pii/S0021755722000791)
Supplement: mmc1 [file S0021755722000791:mmc1.docx]

**JPED-D-22-00010 - Supplementary material**

**Box 1 - Indicators of the performance of newborn screening**

| Newborn screening | 1. Coverage 2. Proportion of valid samples 3. Age of the infant at the time of sample collection 4. Time between sample collection and arrival at the laboratory |
| --- | --- |
| Active search | 1. Proportion of infants recalled. 2. Proportion of infants who attended. 3. Time until attendance |
| Diagnosis | 1. Age of the infant at the time of diagnosis 2. Number and proportion of confirmed cases of cystic fibrosis. |

Adapted from Webster, 20034 and Mendes et al, 2020.15
